# Supplementary material
Source: PubMed Central journal article supplement (PMC9587736)
Supplement: NIHMS1841189-supplement-Supplementary_Mateiral.pdf [file NIHMS1841189-supplement-Supplementary_Mateiral.pdf]

**The following content was supplied by the authors as supporting material and has not been copy-edited or verified by JBJS.**

**Appendix 1.** Current Procedural Terminology (CPT), International Disease Classification (ICD)-10, ICD-9, and Hospital International Classification of Diseases Adapted (HICDA) codes as well as natural language processing (NLP) terms used for patient comorbidity classification.

| CPT   | ICD-10  | ICD-9 | HICDA   | NLP Terms                                                                                                                                                                                                                                                                                                                                                                                                                                                                                                                                                                                                                                                                                                                                                                                                                                                                                                                                                                                                                                                                                                                                                                                              |
|-------|---------|-------|---------|--------------------------------------------------------------------------------------------------------------------------------------------------------------------------------------------------------------------------------------------------------------------------------------------------------------------------------------------------------------------------------------------------------------------------------------------------------------------------------------------------------------------------------------------------------------------------------------------------------------------------------------------------------------------------------------------------------------------------------------------------------------------------------------------------------------------------------------------------------------------------------------------------------------------------------------------------------------------------------------------------------------------------------------------------------------------------------------------------------------------------------------------------------------------------------------------------------|
| 22102 | 0QB00ZZ | 3.02  | 2990111 | Lumbar surgery, lumbar procedure, thoracic surgery, thoracic procedure, cervical surgery, cervical procedure, sacral surgery, sacral procedure, spine surgery, spine procedure, spine fusion, spine arthrodesis, laminectomy, laminotomy, discectomy, diskectomy, microdiscectomy, microdiskectomy, spine decompression, lumbar decompression, thoracic decompression, cervical decompression, kyphoplasty, vertebroplasty, vertebrectomy, corpectomy, Spondylolysis, spondylolisthesis, ankylosing spondylitis, diffuse idiopathic spinal hyperostosis, DISH, spinal stenosis, radiculopathy, lumbar radiculopathy, thoracic radiculopathy, cervical radiculopathy, sacral radiculopathy, spine radiculopathy, stiff spine, spine stiffness, flat back, degenerative disc disease, degenerative disk disease, disk herniation, disc herniation, increased kyphosis, increased lordosis, decreased kyphosis, decreased lordosis, Parkinson's disease, Parkinson's, Parkinsons, Parkinson, normal pressure hydrocephalus, dementia, alzheimer's, alzheimers, alzheimer, multiple sclerosis, supranuclear palsy, ataxia, spastic, spasticity, peripheral neuropathy, alcoholism, alcoholic, fibromyalgia |
| 22114 | 0RG6071 | 3.09  | 2998112 |                                                                                                                                                                                                                                                                                                                                                                                                                                                                                                                                                                                                                                                                                                                                                                                                                                                                                                                                                                                                                                                                                                                                                                                                        |
| 22116 | 0RG607J | 80.5  | 2998113 |                                                                                                                                                                                                                                                                                                                                                                                                                                                                                                                                                                                                                                                                                                                                                                                                                                                                                                                                                                                                                                                                                                                                                                                                        |
| 22207 | 0RG60A0 | 80.51 | 3020110 |                                                                                                                                                                                                                                                                                                                                                                                                                                                                                                                                                                                                                                                                                                                                                                                                                                                                                                                                                                                                                                                                                                                                                                                                        |
| 22212 | 0RG60A1 | 80.54 | 3022110 |                                                                                                                                                                                                                                                                                                                                                                                                                                                                                                                                                                                                                                                                                                                                                                                                                                                                                                                                                                                                                                                                                                                                                                                                        |
| 22214 | 0RG7070 | 80.99 | 3023110 |                                                                                                                                                                                                                                                                                                                                                                                                                                                                                                                                                                                                                                                                                                                                                                                                                                                                                                                                                                                                                                                                                                                                                                                                        |
| 22216 | 0RG7071 | 81.04 | 3025112 |                                                                                                                                                                                                                                                                                                                                                                                                                                                                                                                                                                                                                                                                                                                                                                                                                                                                                                                                                                                                                                                                                                                                                                                                        |
| 22305 | 0RG70A0 | 81.05 | 3025120 |                                                                                                                                                                                                                                                                                                                                                                                                                                                                                                                                                                                                                                                                                                                                                                                                                                                                                                                                                                                                                                                                                                                                                                                                        |
| 22310 | 0RG70A1 | 81.06 | 3059110 |                                                                                                                                                                                                                                                                                                                                                                                                                                                                                                                                                                                                                                                                                                                                                                                                                                                                                                                                                                                                                                                                                                                                                                                                        |
| 22315 | 0RG70K1 | 81.07 | 3059113 |                                                                                                                                                                                                                                                                                                                                                                                                                                                                                                                                                                                                                                                                                                                                                                                                                                                                                                                                                                                                                                                                                                                                                                                                        |
| 22318 | 0RG8071 | 81.08 | 3131110 |                                                                                                                                                                                                                                                                                                                                                                                                                                                                                                                                                                                                                                                                                                                                                                                                                                                                                                                                                                                                                                                                                                                                                                                                        |
| 22325 | 0RGA071 | 81.09 | 3132110 |                                                                                                                                                                                                                                                                                                                                                                                                                                                                                                                                                                                                                                                                                                                                                                                                                                                                                                                                                                                                                                                                                                                                                                                                        |
| 22327 | 0RGA0A0 | 81.34 | 3132111 |                                                                                                                                                                                                                                                                                                                                                                                                                                                                                                                                                                                                                                                                                                                                                                                                                                                                                                                                                                                                                                                                                                                                                                                                        |
| 22328 | 0SB00ZZ | 81.35 | 3132113 |                                                                                                                                                                                                                                                                                                                                                                                                                                                                                                                                                                                                                                                                                                                                                                                                                                                                                                                                                                                                                                                                                                                                                                                                        |
| 22505 | 0SB20ZZ | 81.36 | 3132114 |                                                                                                                                                                                                                                                                                                                                                                                                                                                                                                                                                                                                                                                                                                                                                                                                                                                                                                                                                                                                                                                                                                                                                                                                        |
| 22511 | 0SB40ZZ | 81.37 | 3132115 |                                                                                                                                                                                                                                                                                                                                                                                                                                                                                                                                                                                                                                                                                                                                                                                                                                                                                                                                                                                                                                                                                                                                                                                                        |
| 22512 | 0SB70ZZ | 81.38 | 3139110 |                                                                                                                                                                                                                                                                                                                                                                                                                                                                                                                                                                                                                                                                                                                                                                                                                                                                                                                                                                                                                                                                                                                                                                                                        |
| 22513 | 0SG0071 | 81.39 | 3139111 |                                                                                                                                                                                                                                                                                                                                                                                                                                                                                                                                                                                                                                                                                                                                                                                                                                                                                                                                                                                                                                                                                                                                                                                                        |
| 22514 | 0SG007J | 81.61 | 3139210 |                                                                                                                                                                                                                                                                                                                                                                                                                                                                                                                                                                                                                                                                                                                                                                                                                                                                                                                                                                                                                                                                                                                                                                                                        |
| 22520 | 0SG00A0 | 81.62 | 3139211 |                                                                                                                                                                                                                                                                                                                                                                                                                                                                                                                                                                                                                                                                                                                                                                                                                                                                                                                                                                                                                                                                                                                                                                                                        |
| 22521 | 0SG00A1 | 81.63 | 3420110 |                                                                                                                                                                                                                                                                                                                                                                                                                                                                                                                                                                                                                                                                                                                                                                                                                                                                                                                                                                                                                                                                                                                                                                                                        |

|       |         |        |         |  |
|-------|---------|--------|---------|--|
| 22522 | 0SG00AJ | 81.64  | 3420114 |  |
| 22523 | 0SG03Z1 | 81.65  | 3420120 |  |
| 22524 | 0SG1070 | 81.66  | 3420121 |  |
| 22525 | 0SG1071 | 84.59  | 3420122 |  |
| 22556 | 0SG107J | 290    | 3420123 |  |
| 22558 | 0SG10A0 | 290.1  | 3420210 |  |
| 22585 | 0SG10A1 | 290.2  | 3420430 |  |
| 22610 | 0SG10AJ | 290.3  | 3420810 |  |
| 22612 | 0SG10Z1 | 290.4  | 3420811 |  |
| 22614 | 0SG3070 | 290.41 | 3471210 |  |
| 22630 | 0SG3071 | 290.9  | 3496112 |  |
| 22632 | 0SG307J | 291    | 3579223 |  |
| 22633 | 0SG30A0 | 291.1  | 4251111 |  |
| 22634 | 0SG30A1 | 291.2  | 5350430 |  |
| 22800 | 0SG30AJ | 291.3  | 5710110 |  |
| 22802 | 0SG33Z1 | 291.8  | 5710111 |  |
| 22804 | 0SG507Z | 291.81 | 5710113 |  |
| 22808 | 0SG707Z | 291.82 | 5710115 |  |
| 22810 | 0SG734Z | 291.89 | 5710120 |  |
| 22812 | 0SG737Z | 291.9  | 5710410 |  |
| 22830 | 0SG73JZ | 294.1  | 5770110 |  |
| 22841 | 0SG73KZ | 294.1  | 5771112 |  |
| 22842 | 0SG834Z | 294.11 | 7124110 |  |
| 22843 | 0SG837Z | 294.2  | 7124111 |  |
| 22844 | 0SG83JZ | 294.21 | 7131110 |  |

|       |         |        |         |
|-------|---------|--------|---------|
| 22845 | 0SG83KZ | 294.8  | 7131112 |
| 22846 | 0SH008Z | 294.9  | 7131114 |
| 22848 | 0SH00CZ | 303    | 7131115 |
| 22849 | 0SH03CZ | 303.01 | 7131119 |
| 22850 | 0SH30CZ | 303.02 | 7131121 |
| 22851 | 0SH33CZ | 303.03 | 7131122 |
| 22852 | 0SH704Z | 303.9  | 7131130 |
| 22853 | 0SH734Z | 303.91 | 7131220 |
| 22854 | 0SH804Z | 303.92 | 7131230 |
| 63003 | 0SN00ZZ | 303.93 | 7131240 |
| 63005 | 0SN40ZZ | 305    | 7150410 |
| 63011 | 0SP004Z | 305.01 | 7240120 |
| 63012 | 0SP00JZ | 305.02 | 7250160 |
| 63016 | 0SP304Z | 305.03 | 7251150 |
| 63017 | 0SR30KZ | 331    | 7253150 |
| 63030 | 0ST20ZZ | 331.11 | 7260150 |
| 63035 | 0ST40ZZ | 331.19 | 7260151 |
| 63042 | 0RG7071 | 331.2  | 7270110 |
| 63044 | 0RGA071 | 331.3  | 7359121 |
| 63046 | 0SG1071 | 331.4  | 7561111 |
| 63047 | 0SG3071 | 331.5  | 7561120 |
| 63048 | 0SG30A0 | 331.7  | 7561131 |
| 63050 | 0SP004Z | 331.82 | 7561230 |
| 63051 | 0ST40ZZ | 331.83 | 7598110 |
| 63055 | F01.50  | 331.89 | 7598210 |

|       |         |        |         |  |
|-------|---------|--------|---------|--|
| 63057 | F01.51  | 331.9  | 7731110 |  |
| 63077 | F02.80  | 332    | 7731111 |  |
| 63078 | F02.81  | 332.1  | 7731112 |  |
| 63085 | F03.90  | 357.5  | 7731120 |  |
| 63086 | F03.91  | 425.5  | 7732110 |  |
| 63087 | F05     | 535.3  | 7732120 |  |
| 63088 | F10.10  | 535.3  | 7732130 |  |
| 63090 | F10.11  | 571    | 7732132 |  |
| 63091 | F10.120 | 571.1  | 7732140 |  |
| 63101 | F10.129 | 571.2  | 7732150 |  |
| 63172 | F10.14  | 571.3  | 7732151 |  |
| 63200 | F10.150 | 720    | 7732160 |  |
| 63251 | F10.151 | 720.2  | 7732210 |  |
| 63252 | F10.188 | 720.81 | 7732211 |  |
| 63266 | F10.19  | 720.89 | 7732220 |  |
| 63267 | F10.20  | 720.9  | 7732310 |  |
| 63272 | F10.21  | 721.1  | 7732311 |  |
| 63276 | F10.220 | 721.2  | 7732330 |  |
| 63277 | F10.229 | 721.3  | 7732341 |  |
| 63278 | F10.230 | 721.41 | 7732450 |  |
| 63281 | F10.231 | 721.42 | 7734110 |  |
| 63282 | F10.232 | 721.5  | 7734111 |  |
| 63303 | F10.239 | 721.6  | 7734210 |  |
| 22214 | F10.24  | 721.7  | 7734310 |  |
| 22216 | F10.280 | 721.9  | 7734320 |  |

|       |         |        |          |
|-------|---------|--------|----------|
| 22558 | F10.288 | 721.91 | 7734410  |
| 22612 | F10.94  | 722.1  | 7734411  |
| 22614 | F10.959 | 722.51 | 7734412  |
| 22843 | F10.982 | 722.52 | 7734414  |
| 22845 | F10.99  | 722.6  | 7734510  |
| 22848 | G20     | 722.7  | 7886110  |
| 63005 | G21.11  | 722.71 | 7886210  |
| 63047 | G21.8   | 722.72 | 7886211  |
| 63048 | G21.9   | 722.73 | 7886212  |
|       | G30.8   | 722.83 | 7886214  |
|       | G30.9   | 723    | 7886215  |
|       | G31.09  | 724    | 7886220  |
|       | G31.2   | 724.01 | 7893213  |
|       | G31.83  | 724.02 | 7893214  |
|       | G62.1   | 724.03 | 7893215  |
|       | I42.6   | 724.09 | 7901230  |
|       | K70.0   | 724.4  | 34632110 |
|       | K70.10  | 729.1  | 34632111 |
|       | K70.11  | 733.3  |          |
|       | K70.30  | 738.4  |          |
|       | K70.31  | 756.12 |          |
|       | K70.40  | 756.83 |          |
|       | K70.9   | 759.82 |          |
|       | K85.2   | 790.3  |          |
|       | M43.14  | 980.9  |          |

|        |       |  |  |
|--------|-------|--|--|
| M43.15 | V11.3 |  |  |
| M43.16 | V79.1 |  |  |
| M43.17 |       |  |  |
| M43.19 |       |  |  |
| M45.0  |       |  |  |
| M45.2  |       |  |  |
| M45.4  |       |  |  |
| M45.6  |       |  |  |
| M45.7  |       |  |  |
| M45.8  |       |  |  |
| M45.9  |       |  |  |
| M46.1  |       |  |  |
| M46.80 |       |  |  |
| M46.86 |       |  |  |
| M46.88 |       |  |  |
| M46.89 |       |  |  |
| M46.90 |       |  |  |
| M46.95 |       |  |  |
| M46.96 |       |  |  |
| M46.97 |       |  |  |
| M46.98 |       |  |  |
| M47.12 |       |  |  |
| M47.13 |       |  |  |
| M47.14 |       |  |  |
| M47.16 |       |  |  |

|         |  |  |  |
|---------|--|--|--|
| M47.24  |  |  |  |
| M47.25  |  |  |  |
| M47.26  |  |  |  |
| M47.27  |  |  |  |
| M47.814 |  |  |  |
| M47.815 |  |  |  |
| M47.816 |  |  |  |
| M47.817 |  |  |  |
| M47.818 |  |  |  |
| M47.819 |  |  |  |
| M47.894 |  |  |  |
| M47.895 |  |  |  |
| M47.896 |  |  |  |
| M47.897 |  |  |  |
| M47.898 |  |  |  |
| M47.9   |  |  |  |
| M48.00  |  |  |  |
| M48.02  |  |  |  |
| M48.03  |  |  |  |
| M48.04  |  |  |  |
| M48.05  |  |  |  |
| M48.06  |  |  |  |
| M48.061 |  |  |  |
| M48.062 |  |  |  |
| M48.07  |  |  |  |

|         |  |  |  |
|---------|--|--|--|
| M48.10  |  |  |  |
| M48.12  |  |  |  |
| M48.26  |  |  |  |
| M51.04  |  |  |  |
| M51.06  |  |  |  |
| M51.35  |  |  |  |
| M51.36  |  |  |  |
| M51.37  |  |  |  |
| M51.44  |  |  |  |
| M51.45  |  |  |  |
| M51.46  |  |  |  |
| M51.84  |  |  |  |
| M51.86  |  |  |  |
| M51.87  |  |  |  |
| M51.9   |  |  |  |
| M54.15  |  |  |  |
| M79.7   |  |  |  |
| M85.2   |  |  |  |
| M96.1   |  |  |  |
| Q76.2   |  |  |  |
| Q79.6   |  |  |  |
| Q87.40  |  |  |  |
| Q87.410 |  |  |  |
| Q87.418 |  |  |  |
| R78.0   |  |  |  |



|  |       |  |  |  |
|--|-------|--|--|--|
|  | Y90.1 |  |  |  |
|  | Y90.3 |  |  |  |
|  | Y90.5 |  |  |  |
|  | Y90.7 |  |  |  |
|  | Y90.8 |  |  |  |
|  | Y90.9 |  |  |  |
